# Supplementary material for: Ultrafast imaging of spontaneous symmetry breaking in a photoionized molecular system
Source: PubMed Central journal article supplement (PMC8270947; doi:10.1038/s41467-021-24309-z), 2021-07-09
Supplement: 41467_2021_24309_MOESM1_ESM.pdf [file 41467_2021_24309_MOESM1_ESM.pdf]

1 **Supplemental Material: Ultrafast imaging of spontaneous**  
2 **symmetry breaking in a photoionized molecular system**

3 Min Li<sup>\*</sup>,<sup>1</sup> Ming Zhang<sup>\*,2,3</sup> Oriol Vendrell,<sup>4</sup> Zhenning Guo,<sup>2</sup> Qianru Zhu,<sup>5</sup> Xiang  
4 Gao,<sup>5</sup> Lushuai Cao,<sup>5</sup> Keyu Guo,<sup>1</sup> Qin-Qin Su,<sup>1</sup> Wei Cao,<sup>1,\*</sup> Siqiang Luo,<sup>1</sup> Jiaqing  
5 Yan,<sup>1</sup> Yueming Zhou,<sup>1</sup> Yunquan Liu,<sup>2,†</sup> Zheng Li,<sup>2,‡</sup> and Peixiang Lu<sup>1,6,7,§</sup>

6 <sup>1</sup>*Wuhan National Laboratory for Optoelectronics and School of Physics,*  
7 *Huazhong University of Science and Technology, Wuhan 430074, China*

8 <sup>2</sup>*State Key Laboratory for Mesoscopic Physics and*  
9 *Collaborative Innovation Center of Quantum Matter,*  
10 *School of Physics, Peking University, Beijing 10087, China*

11 <sup>3</sup>*University of Science and Technology Beijing, Beijing 10087, China*

12 <sup>4</sup>*Physikalisch-Chemisches Institut, Universität Heidelberg,*  
13 *Im Neuenheimer Feld 229, D-69120 Heidelberg, Germany*

14 <sup>5</sup>*MOE Key Laboratory of Fundamental Physical Quantities Measurement and Hubei*  
15 *Key Laboratory of Gravitation and Quantum Physics, PGMF and School of Physics,*  
16 *Huazhong University of Science and Technology, Wuhan 430074, China*

17 <sup>6</sup>*Hubei Key Laboratory of Optical Information and Pattern Recognition,*  
18 *Wuhan Institute of Technology, Wuhan 430205, China*

19 <sup>7</sup>*CAS Center for Excellence in Ultra-intense Laser Science, Shanghai 201800, China*

20 (Dated: June 12, 2021)

21 PACS numbers: 32.80.Fb, 42.50.Hz, 32.80.Rm

---

\* weicao@hust.edu.cn

† yunquan.liu@pku.edu.cn

‡ zheng.li@pku.edu.cn

§ lupeixiang@hust.edu.cn

## 1 I. COULOMB MOMENTUM MAPPING

2 To calculate the momentum distribution of three-body breakup channel ( $\text{CH}_2^+ + \text{H}^+ + \text{H}^+$ )  
 3 from different configurations, the Coulomb explosion is simulated by the classical Hamilto-  
 4 nian of three point charged particles [1]

$$H = T + V_{\text{Coul}}(r_1, r_2, r_C) \quad (1)$$

$$V_{\text{Coul}}(r_1, r_2, r_C) = \frac{1}{r_{12}} + \frac{1}{r_{1C}} + \frac{1}{r_{2C}}, \quad (2)$$

5 where  $T$  is the kinetic energy,  $r_1$ ,  $r_2$  and  $r_C$  are coordinates of two ionized  $\text{H}^+$  and the mass  
 6 point of  $\text{CH}_2^+$ , respectively. Molecular dynamics is carried out for 2500 fs, with the initial  
 7 positions set to equilibrium geometry of  $C_{3v}$ ,  $C_{2v}$ ,  $D_{2d}$  and initial momentum set to zero.

8 The configuration evolution of  $\text{CH}_4^+$  can be revealed by momentum distribution of  $\text{CH}_2^+$ -  
 9  $\text{H}^+ - \text{H}^+$  three-body explosion result. Each event can be classified into one of these symmetry  
 10 configurations according to the distance in momentum space. The  $i$ -th event is described  
 11 by the four coordinates in Newton plot  $p_{x,\text{CH}_2^+}^{(i)}, p_{y,\text{CH}_2^+}^{(i)}, p_{x,\text{H}^+}^{(i)}, p_{y,\text{H}^+}^{(i)}$  and the momentum of  
 12 another  $\text{H}^+$  ion is set to be  $(1, 0)$ . The distance between the  $i$ -th event and one of the  $C_{3v}$   
 13 configurations is defined by

$$d_{i,C_{3v}}^2 = (p_{x,\text{CH}_2^+}^{(i)} - p_{x,\text{CH}_2^+}^{(C_{3v})})^2 + (p_{y,\text{CH}_2^+}^{(i)} - p_{y,\text{CH}_2^+}^{(C_{3v})})^2 \quad (3)$$

$$+ (p_{x,\text{H}^+}^{(i)} - p_{x,\text{H}^+}^{(C_{3v})})^2 + (p_{y,\text{H}^+}^{(i)} - p_{y,\text{H}^+}^{(C_{3v})})^2.$$

14 The distance between event  $i$  and  $C_{3v}$  is defined by the minimum value of its distance to  
 15 each different  $C_{3v}$  configuration and so do  $C_{2v}$  and  $D_{2d}$ . Each exploded  $\text{CH}_4^+$  is classified  
 16 to the symmetry of minimal distance. The configuration evolution of  $\text{CH}_4^+$  and comparison  
 17 with MD simulation of two-body explosion channels is shown in Fig. S1.

## 18 II. MOLECULAR DYNAMICS SIMULATION DETAILS

19 MCSCF method and DZV basis are used for  $\text{CH}_4^+$  configuration evolution including an  
 20 active space of 7 orbitals. Only  $1s$  orbital of  $C$  atom is regarded as core orbital and doubly  
 21 occupied. For each time point in the  $\text{CH}_4^+$  trajectory, dication occurs at the instant of  
 22 the probe pulse. MCSCF method and DZV basis are used for the propagation of  $\text{CH}_4^{2+}$   
 23 trajectories.

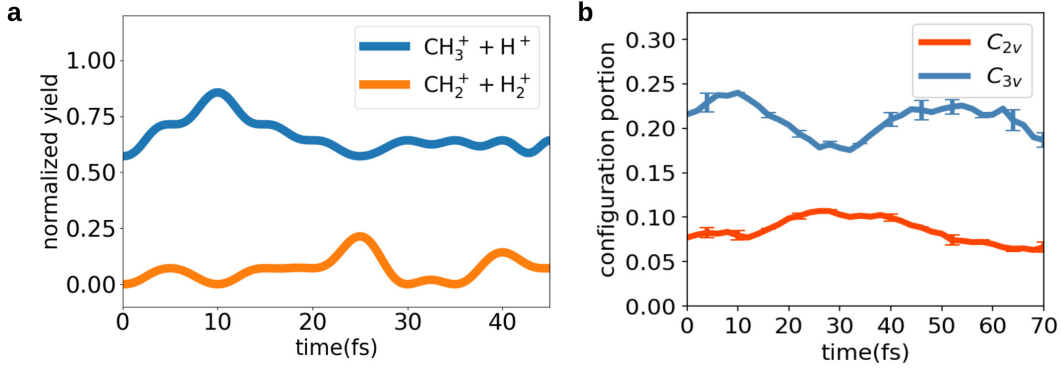

FIG. S1. **Temporal evolution in symmetry space.** Comparison between **a** simulated two-body explosion result and **b** configuration evolution of  $\text{CH}_4^+$  from three-body measurement data. The error bars in **b** represent the mean absolute deviation of the statistical errors. The 15 fs time difference from  $\text{CH}_3^+ + \text{H}^+$  channel to  $\text{CH}_2^+ + \text{H}_2^+$  channel is consistent with the 20 fs experimental time delay, which corresponds to the 20 fs time difference between  $C_{3v}$  peak and  $C_{2v}$  peak.

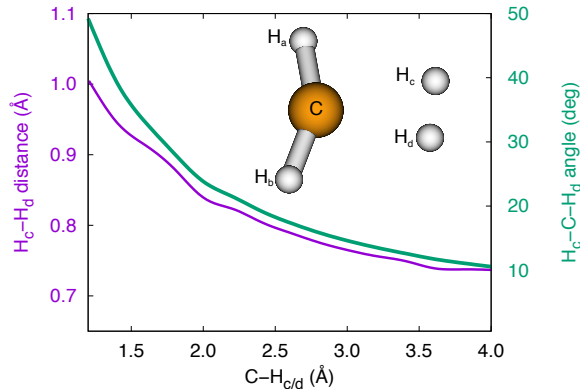

FIG. S2. **Breakup path optimized for the ground state ( $^1A_1$ ) of  $\text{CH}_4^{2+}$  dication.** The minimal energy geometric parameters for the methane cation with stretched C-H<sub>c/d</sub> bonds. The purple line is for the H<sub>c</sub>-H<sub>d</sub> distance and the thick green line is for the H<sub>c</sub>-C-H<sub>d</sub> angle.

1 To demonstrate the fragmentation channel from the  $C_{2v}$  geometry of methane cation to  
 2  $\text{CH}_2^+ + \text{H}_2^+$ , we calculate the pathway of the Coulomb explosion after double ionization in the  
 3  $^1A_1$  ground state of  $C_{2v}$  symmetry. The structures along the path were determined for each  
 4 given C-H<sub>c</sub> and C-H<sub>d</sub> distances of the leaving hydrogen atoms. As shown in Fig. S2, the H<sub>c</sub>-  
 5 H<sub>d</sub> distance stays short and the H<sub>c</sub>-C-H<sub>d</sub> angle stays small in the lowest  $^1A_1$  state for a very  
 6 long C-H bond, which indicates the  $\text{CH}_2^+ + \text{H}_2^+$  fragmentation for the  $C_{2v}$  geometry. Besides, a  
 7 schematic dephasing and revival process of three vibrational modes leading to  $C_{2v}$  geometry

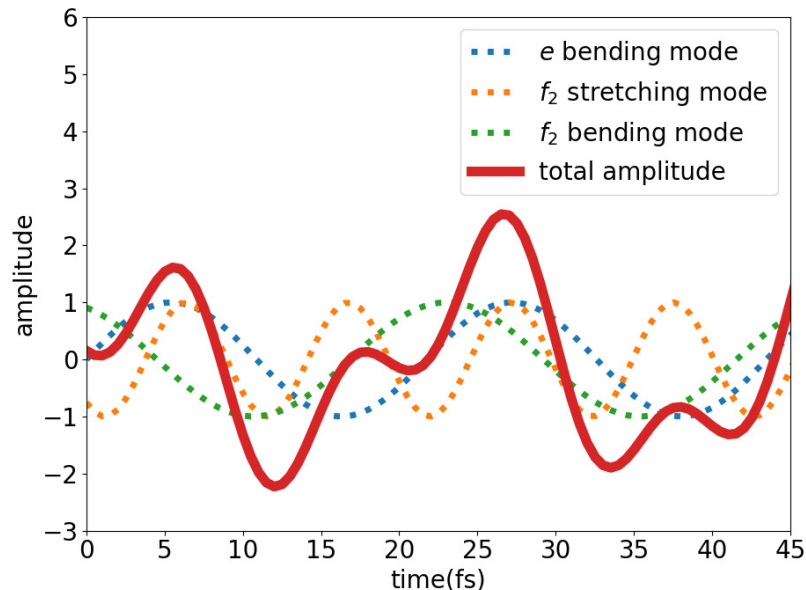

FIG. S3. **Multi-mode dynamics of Jahn-Teller distortion.** Revival and dephasing processes of  $e$  bending mode,  $f_2$  stretching mode and  $f_2$  bending mode of equal amplitude. The peaks at  $\sim 5$  fs and  $\sim 25$  fs are in good agreement with  $\text{CH}_2^+ + \text{H}_2^+$  channel of Fig. 4a in the main text. The harmonic frequencies and corresponding vibrational periods are adapted from Ref. [2],  $\nu(a_1) = 3077\text{cm}^{-1}$  (10.8fs),  $\nu(e) = 1534\text{cm}^{-1}$  (21.0fs),  $\nu(f_2) = 3212\text{cm}^{-1}$  (10.4fs), and  $\nu'(f_2) = 1349\text{cm}^{-1}$  (24.7fs), where the  $a_1$  mode cannot change symmetry and hence does not participate in the JT distortion.

1 is shown in Fig. S3. The total amplitude fluctuates due to their commensurate frequencies.  
 2 The peaks of total vibration means  $\text{CH}_4^+$  approaches  $C_{2v}$  configuration, which indicates more  
 3 contribution to  $\text{CH}_2^+ + \text{H}_2^+$  channel.

4 The initial condition of the classical MD simulation is taken for the geometries in the  
 5 vicinity of the  $T_d$  symmetric configurations, and thermal velocities at experimental temper-  
 6 ature. It means that to a good approximation mostly the DOFs of ground vibrational state  
 7 of the system are populated, and is a good approximation of the quantum mechanical distri-  
 8 bution sampling, e.g. Wigner sampling, in which for each normal mode the trajectories are  
 9 set on the corresponding Bohr orbit. The error originated from variation of initial velocity  
 10 should be minor, because the thermal energy of  $\text{CH}_4$  molecule at 300K is  $\sim 0.1\text{eV}$ , it is order  
 11 of magnitude smaller than the stabilization energy of 1.5eV, which dominates dynamical JT  
 12 process.

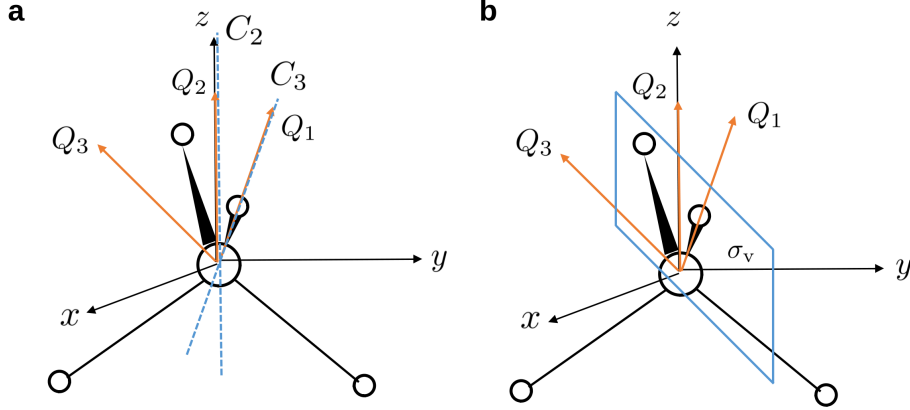

FIG. S4. **Symmetry elements conserved under  $Q_1, Q_2, Q_3$  distortion.** **a** The distortion  $Q_1$  is invariant under symmetry operation  $C_3$ , and  $Q_2$  is invariant under  $C_2$ . **b** The distortions  $Q_1, Q_2, Q_3$  remain invariant under symmetry operation  $\sigma_v$ .

### 1 III. THE CORRESPONDENCE OF VIBRATIONAL MODES AND SYMMETRY 2 DISTORTIONS

3 Here we analyse the distorted geometry of Jahn-Teller molecules under specified vibra-  
4 tional coordinates [3, 4]. Although the molecule under JT effect is forced to distort, the  
5 nuclear configuration with maximum symmetry must be preferentially produced.

6 For the methane cation of  $T_d$  point group, from the character table, one typical basis of  $f_2$   
7 vibration is  $(x, y, z)$ . The space spanned by basis  $(x, y, z)$  is called distortion space, because a  
8 set of  $f_2$  vibrational coordinates have identical transformation properties to  $f_2$  representation  
9 basis  $(x, y, z)$ . For any element in the distortion space, there are some conserved symmetry  
10 operations, which correspond to the operations of the same character to the identity operator.  
11 These operations form a group denoted  $K(T_d, f_2)$ . From the character table

$$K(T_d, f_2) = C_1. \quad (4)$$

12 If there exists some special distortions, such that more symmetry operations of the original  
13 point group are conserved, these symmetry operations form a group belonging to  $E(T_d, f_2)$ ,  
14 which is a set of subgroups of  $T_d$ .

15 A symmetry element will remain symmetric under a distortion if and only if this symmetry  
16 operation leaves the distortion invariant. For example, under distortion  $Q_1 = x + y + z$ ,  
17 some symmetry operations (besides identity element  $E$ ) will conserve, such as  $C_3$  and  $\sigma_v$  in

1 Fig. S4

$$C_3Q_1 = C_3x + C_3y + C_3z = y + z + x = Q_1 \quad (5)$$

$$\sigma_vQ_1 = \sigma_vx + \sigma_vy + \sigma_vz = y + x + z = Q_1. \quad (6)$$

2 All these symmetry operations form a group  $C_{3v}$ . Similarly, under distortion  $Q_2 = z$ ,  
 3 symmetry operations such as  $C_2$  and  $\sigma_v$  will conserve

$$C_2Q_2 = C_2z = z = Q_2 \quad (7)$$

$$\sigma_vQ_2 = \sigma_vz = z = Q_2, \quad (8)$$

4 they form a group  $C_{2v}$ . And under  $Q_3 = -(x + y)$ , only  $\sigma_v$  will conserve

$$\sigma_vQ_3 = \sigma_v(-x) + \sigma_v(-y) = -(y + x) = Q_3, \quad (9)$$

which corresponds to point group  $C_s$ . In conclusion,

$$E(T_d, f_2) = \{C_{3v}, C_{2v}, C_s\}. \quad (10)$$

5 So there exist some special distortions, such that the distorted geometry can remain in  
 6 higher symmetry. Thus we know that  $f_2$  mode leads to  $C_{3v}$  and  $C_{2v}$  distorted geometry and  
 7 the maximal symmetric  $C_{3v}$  is preferred.

8 Similarly, for  $e$  representation

$$K(T_d, e) = D_2 \quad (11)$$

$$E(T_d, e) = D_{2d}. \quad (12)$$

9 A typical basis for  $e$  representation of  $T_d$  point group is  $(2z^2 - x^2 - y^2, x^2 - y^2)$ . Obviously,  
 10 there exists a distortion  $Q_4 = 2z^2 - x^2 - y^2$  which remains unchanged under the symmetry  
 11 operations in  $D_{2d}$  subgroup.

12 Hence,  $\text{CH}_4^+$  is distorted to  $D_{2d}$  geometry due to  $e$  bending mode, and  $f_2$  mode leads  
 13 to  $C_{3v}$  and  $C_{2v}$  distorted geometry, as shown in Fig.4 in the main text. See Ref.[3] for  
 14 the expression for each vibrational coordinate. Both  $f_2$  mode and  $e$  mode contribute to  
 15  $\text{CH}_2^+ + \text{H}_2^+$  channel, whose dephasing and revival process correspond to the second peak of  
 16 simulation results as well as  $\sim 20\text{fs}$  delay from experiment. However, only the  $f_2$  stretching  
 17 mode will lead to  $\text{CH}_3^+ + \text{H}^+$  channel.

## 1 IV. WAVE PACKET DYNAMICS SIMULATION

2 To understand the dynamics of the JT distortion, we carried out wave packet dynamics  
 3 simulation using the multi-configuration time-dependent Hartree (MCTDH) method [5],  
 4 based on an effective Hamiltonian by considering molecular symmetry. In the Hamiltonian,  
 5 the potential of the corresponding  $F \otimes (f \oplus e)$  JT effect of  $\text{CH}_4^+$  is mapped onto the surface of  
 6 a sphere [6, 7], where the  $e$  and  $f_2$  vibrational modes are parametrized by spherical harmonics  
 7 of order  $l = 2$  (Atomic units (a.u.) are used throughout unless specified otherwise),

$$\begin{aligned}
 Q_{e'} &= d [3(\cos \theta)^2 - 1] \\
 Q_{e''} &= d\sqrt{3}(\sin \theta)^2 \cos(2\phi) \\
 Q_{f'} &= d\sqrt{3} \sin(2\theta) \sin \phi \\
 Q_{f''} &= d\sqrt{3} \sin(2\theta) \cos \phi \\
 Q_{f'''} &= d\sqrt{3}(\sin \theta)^2 \sin(2\phi), \tag{13}
 \end{aligned}$$

8 where  $\theta$  and  $\phi$  are the parameterized coordinates and  $d = 0.373 \text{ \AA}$  is a parametrized distort-  
 9 tion parameter [7].

10 The linear JT effect of  $f_2$  vibration produces methane cation in  $C_{3v}$ , which contributes  
 11 to the fragmentation into  $\text{CH}_3^+ + \text{H}^+$ . Because of the degenerate ground state, this struc-  
 12 ture undergoes a JT effect to  $C_{2v}$  geometry[8], which dissociates to  $\text{CH}_2^+ + \text{H}_2^+$ . The JT  
 13 deformation dynamics is governed by the parametric model Hamiltonian [7],

$$\begin{aligned}
 \hat{H} &= \hat{T} + \hat{V}(\theta, \phi) \\
 \hat{T} &= -t \left[ \frac{1}{\sin \theta} \frac{\partial}{\partial \theta} \left( \sin \theta \frac{\partial}{\partial \theta} \right) + \frac{1}{\sin^2 \theta} \frac{\partial^2}{\partial \phi^2} \right] \\
 \hat{V}(\theta, \phi) &= V_0 + \sqrt{\frac{7}{12}} \left[ Y_{4,0} + \sqrt{\frac{5}{14}} (Y_{4,4} + Y_{4,-4}) \right] V_4 \\
 &\quad + \frac{1}{\sqrt{8}} \left[ Y_{6,0} - \sqrt{\frac{7}{2}} (Y_{6,4} + Y_{6,-4}) \right] V_6, \tag{14}
 \end{aligned}$$

14 where  $t = 10 \text{ cm}^{-1}$  is the pseudo-rotation parameter, the potential parameters are chosen  
 15 to be  $V_0 = 0$ ,  $V_4 = -2260 \text{ cm}^{-1}$ ,  $V_6 = 3100 \text{ cm}^{-1}$ , which approximately reproduce the  
 16 JT stabilization energy and the *ab initio* energy values of the methane cation [7]. The  
 17 initial wavepacket is prepared in vicinity of the symmetric points on the surface of the  
 18 sphere, which represents the  $C_{3v}$  configurations with a contracted C-H bond, and favors

1 the  $\text{CH}_3^+ + \text{H}^+$  breakup channel in the laser-induced Coulomb explosion. Following the  
 2 Franck-Condon principle, the FWHM width of the initial wavepacket  $\Psi(\theta, \phi)$  is set such  
 3 that the corresponding  $E$  vibrational coordinates  $Q_{e'}$  and  $Q_{e''}$  have the width of the ground  
 4 state wave function [7]. To analyse the population of  $C_{2v}$  configurations in the final state  
 5 wavepacket, the wavepacket densities in the vicinity  $(\Delta\theta, \Delta\phi)$  of the  $C_{2v}$  points on the  
 6 sphere are integrated, where  $(\Delta\theta, \Delta\phi)$  is phenomenologically taken as the width of the  
 7 initial wavepacket. The potential energy surface and the time dependence of the population  
 8 is shown in Figs. 5a and 5b of the main text. One can see that the population in the  $D_{2d}$   
 9 configuration is much smaller than that in the  $C_{2v}$  configuration. Moreover, the population  
 10 of the  $C_{2v}$  configurations peaks at  $\sim 18.7$  fs, which is almost consistent with the measurement.  
 11 Using this time delay between the two breakup channels, we can reproduce the experimental  
 12 data shown in Fig. 2 of the main text. The KER of the fragments from the Coulomb explosion  
 13 is related to the distance  $R$  between the centers of mass for the  $\text{CH}_2^+ + \text{H}_2^+$  and  $\text{CH}_3^+ + \text{H}^+$   
 14 fragments at the moment of separation by  $\text{KER} \approx 1/R$ . We assume that the reduced mass  
 15 of the nuclei starts moving with constant velocity, thus the distance  $R$  can be expressed as  
 16  $R \approx R_0 + v_0 t$ , where  $R_0$  is the initial distance and  $v_0$  is the velocity adjusted to best fit with  
 17 the experiment. With a time delay of 18.7 fs between the two breakup channels, we achieve  
 18 a good agreement between the simulation and the measurement, as shown in Fig. 2 of the  
 19 main text.

## 20 **V. LASER POWER DEPENDENCY CHECK OF THE THREE-BODY BREAKUP** 21 **CHANNELS**

22 Under condition that the pump and probe pulses are of identical wavelength and intensity,  
 23 it could thus well be that the results of the three-body breakup contain a superposition of  
 24 two pathways, (i) pump from neutral to cation, probe from cation to dication, and (ii) pump  
 25 from neutral to dication, probe from dication to trication.

26 In order to clarify that the three-body breakup yields are dominantly contributed by  
 27 the cation before the probe pulse, we have carried out the laser power dependency check  
 28 experimentally for the three-body Coulomb explosion channel by reducing the intensity of  
 29 pump pulse to 1/4 ( $\sim 0.7 \times 10^{14} \text{W/cm}^2$ ) and keeping the intensity of probe pulse invariant  
 30 ( $\sim 3 \times 10^{14} \text{W/cm}^2$ ). Under this condition, the probability of double ionization by the pump



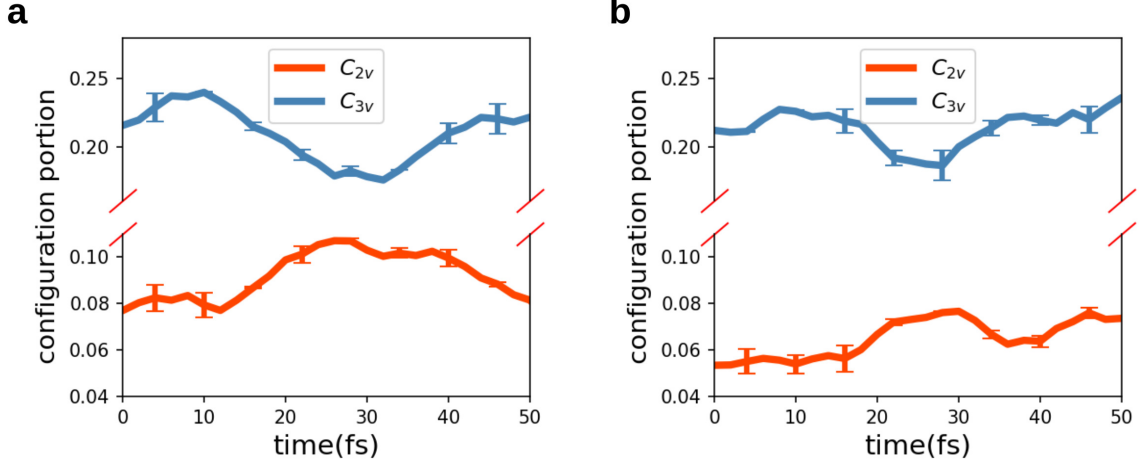

FIG. S5. **Three-body Coulomb explosion probe at various pump intensities.** Temporal evolution of  $C_{3v}$  like and  $C_{2v}$  like symmetry configurations of **a**  $\sim 3 \times 10^{14} \text{W/cm}^2$  pump pulse intensity and **b** reduced pump pulse of intensity  $\sim 0.7 \times 10^{14} \text{W/cm}^2$  with mean absolute error, the delays between  $C_{3v}$  to  $C_{2v}$  peaks are 20 fs ( $3 \times 10^{14} \text{W/cm}^2$  pump) and 22 fs ( $0.7 \times 10^{14} \text{W/cm}^2$  pump), respectively. The configuration evolution from  $C_{3v}$  to  $C_{2v}$  as well as the delay between these two peaks are both insensitive to the change of pump pulse intensity.

1 pulse must be substantially reduced. As a result, the relative portion of dication after the  
 2 pump pulse should become smaller, i.e., the pathway (ii) is suppressed under this condition.  
 3 We present the result of the temporal evolution for configurations of specific symmetries  
 4  $C_{3v}$  and  $C_{2v}$  under reduced pump pulse intensity. The qualitative consistency of the power  
 5 dependency check reflects the fact that the pathway (ii) can be removed when understanding  
 6 the temporal evolution of configurations shown in the Fig. S5. We further measured the mass  
 8 to charge ratio ( $m/q$ ) spectra of ionic species for the pump laser pulse alone with various  
 9 intensities, from which the yields of  $\text{CH}_4^{2+}$  and  $\text{CH}_4^+$  can be directly determined. Because part  
 10 of the  $\text{CH}_4^{2+}$  dication could dissociate to  $\text{CH}_3^+ + \text{H}^+$  and  $\text{CH}_2^+ + \text{H}_2^+$ , we extract the number  
 11 of the two dissociation events in the photoion-photoion coincidence spectra (PIPICO) for  
 12 various pump intensities. Subtracting the number of  $\text{CH}_3^+ + \text{H}^+$  events from the counts of  
 13  $\text{CH}_3^+$  in the  $m/q$  spectra gives us the yield of the  $\text{CH}_3^+ + \text{H}^+$  channel. The final results of  
 14 dication to cation ratio analysis are presented in Fig. S6. Even at highest pump intensity  
 15 of  $3 \times 10^{14} \text{W/cm}^2$ , the ratio of dication (sum yield of three channels of  $\text{CH}_4^{2+}$ ,  $\text{CH}_3^+ + \text{H}^+$ ,  
 16 and  $\text{CH}_2^+ + \text{H}_2^+$ ) to cation (sum yield of two channels of  $\text{CH}_4^+$  and  $\text{CH}_3^+ + \text{H}^+$ ) is  $\sim 3.5 \times 10^{-2}$ ,

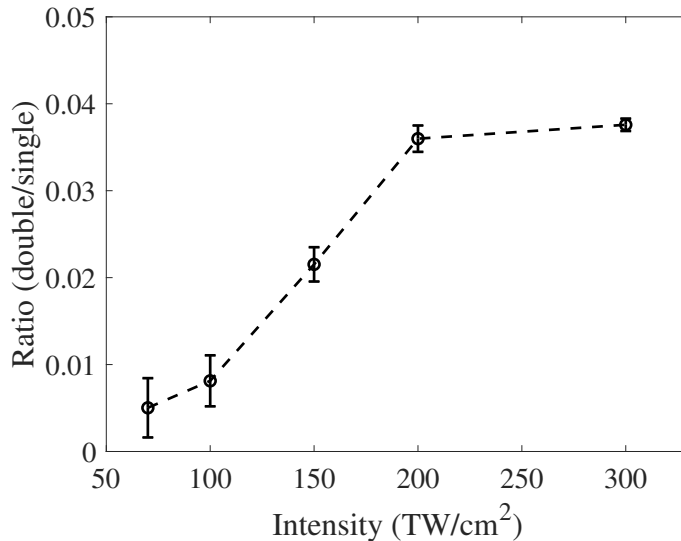

FIG. S6. **The ratio of dication to cation of methane molecules at various pump intensities.** The ratios are determined from mass to charge spectra and photoion-photoion coincidence spectra (PIPICO). The error bars show the standard deviation of the statistical errors.

1 and is of  $5 \times 10^{-3}$  at lower pump intensities used for the power dependency check. The  
 2 signals at the mass to charge ratios for  $\text{CH}^{2+}$  and  $\text{CH}^{3+}$  species do not exhibit peaks above  
 3 background level. The small ratio of dication species could be resulted from its relatively  
 4 high double ionization potentials, the lowest of which is calculated to be 23.43 eV on the  
 5 SA-CASSCF(7,7)//aug-cc-pVTZ (cation) and SA-CASSCF(6,7)//aug-cc-pVTZ (dication)  
 6 level by the complete active space self-consistent field method. It explains the negligible  
 7 contribution of dication to the JT dynamics of methane cation initiated by the pump pulses  
 8 of  $0.7 - 3 \times 10^{14} \text{W/cm}^2$  intensity.

- 
- 9 [1] Li, Z. et al. Ultrafast isomerization in acetylene dication after carbon K-shell ionization. *Nature*  
 10 *Comm.* **8**, 453 (2017).  
 11 [2] Mondal, T. & Varandas, A. J. C. Structural evolution of the methane cation in subfemtosecond  
 12 photodynamics. *J. Chem. Phys.* **143**, 014304 (2015).  
 13 [3] B.Bersuker, I. *The Jahn-Teller Effect*. (Cambridge University Press, 2006).  
 14 [4] Ceulemans, A. & Vanquickenborne, L. G. The epikernel principle. *Structure and Bonding* **66**,

- 1 125–158 (1989).
- 2 [5] Beck, M. H., Jäckle, A., Worth, G. A. & Meyer, H.-D. The multiconfiguration time-dependent  
3 Hartree method: A highly efficient algorithm for propagating wavepackets. *Phys. Rep.* **324**,  
4 1–105 (2000).
- 5 [6] Chancey, C., O’Brien, M. & O’Brien, M. *The Jahn-Teller effect in C<sub>60</sub> and other icosahedral*  
6 *complexes*. (Princeton University Press, 1997).
- 7 [7] Jacovella, U., Wörner, H. J. & Merkt, F. Jahn-teller effect and large-amplitude motion in  
8 CH<sub>4</sub><sup>+</sup> studied by high-resolution photoelectron spectroscopy of CH<sub>4</sub>. *J. Mol. Struct.* **343**, 62–75  
9 (2018).
- 10 [8] Frey, R. F. & Davidson, E. R. Potential energy surfaces of CH<sub>4</sub><sup>+</sup>. *J. Chem. Phys.* **88**, 1775–1785  
11 (1988).
